# Supplementary material for: Contributions of SpoT Hydrolase, SpoT Synthetase, and RelA Synthetase to Carbon Source Diauxic Growth Transitions in Escherichia coli
Source: Front Microbiol. 2018 Aug 3;9:1802. doi: 10.3389/fmicb.2018.01802 (PMC6085430; doi:10.3389/fmicb.2018.01802)
Supplement: Supplementary file 7 [file Table_3.XLSX]

## Sheet: Different sugars
		wt	ΔrelA	SpoT E319Q
glucose + lactose	diaixic time	46.93 ± 2.54	68.57 ± 4.66	59.49 ± 5.20
	dbl/h (1)	0.46 ± 0.03	0.50 ± 0.03	0.44 ± 0.04
	dbl/h (2)	0.45 ± 0.02	0.50 ± 0.03	0.44 ± 0.03
glucose + maltose	diaixic time	110.46 ± 5.73	189.86 ± 29.66	138.16 ± 12.26
	dbl/h (1)	0.48 ± 0.03	0.47 ± 0.03	0.42 ± 0.04
	dbl/h (2)	0.13 ± 0.05	0.20 ± 0.02	0.16 ± 0.06
glucose + succinate	diaixic time	42.01 ± 9.56	117.44 ± 16.76	70.85 ± 6.54
	dbl/h (1)	0.59 ± 0.03	0.61 ± 0.06	0.56 ± 0.05
	dbl/h (2)	0.25 ± 0.03	0.38 ± 0.06	0.25 ± 0.03
glucose + glycerol	diaixic time	37.69 ± 3.41	68.53 ± 9.16	39.44 ± 5.07
	dbl/h (1)	0.52 ± 0.04	0.52 ± 0.03	0.46 ± 0.05
	dbl/h (2)	0.41 ± 0.02	0.41 ± 0.07	0.37 ± 0.03
glucose + lactate	diaixic time	39.78 ± 6.02	72.87 ± 9.63	67.91 ± 6.66
	dbl/h (1)	0.68 ± 0.02	0.69 ± 0.04	0.63 ± 0.03
	dbl/h (2)	0.30 ± 0.02	0.21 ± 0.04	0.31 ± 0.02
glucose + malate	diaixic time	66.35 ± 7.67	110.59 ± 16.43	77.51 ± 4.84
	dbl/h (1)	0.67 ± 0.03	0.69 ± 0.04	0.63 ± 0.03
	dbl/h (2)	0.21 ± 0.04	0.23 ± 0.04	0.20 ± 0.01
mannose + glucose	diaixic time	11.55 ± 3.76	18.30 ± 2.74	15.89 ± 3.62
	dbl/h (1)	0.52 ± 0.02	0.48 ± 0.02	0.46 ± 0.04
	dbl/h (2)	0.42 ± 0.02	0.41 ± 0.04	0.40 ± 0.02
fructose + glucose	diaixic time	18.18 ± 4.28	21.52 ± 3.78	22.17 ± 6.57
	dbl/h (1)	0.54 ± 0.02	0.48 ± 0.01	0.49 ± 0.04
	dbl/h (2)	0.48 ± 0.02	0.42 ± 0.04	0.47 ± 0.02
glucose + AA + lactose	diaixic time	38.77 ± 5.54	43.30 ± 5.31	39.85 ± 6.06
	dbl/h (1)	1.09 ± 0.03	1.06 ± 0.08	1.04 ± 0.07
	dbl/h (2)	0.80 ± 0.03	0.72 ± 0.04	0.80 ± 0.05
glucose + Lactose + succinate	diaixic time	31.30 ± 8.88	29.50 ± 5.78	34.63 ± 6.47
	dbl/h (1)	0.66 ± 0.03	0.72 ± 0.08	0.62 ± 0.04
	dbl/h (2)	0.47 ± 0.02	0.43 ± 0.08	0.45 ± 0.04
Table S3: Average and standard desviation of diauxic time and growth rate in glucose (1) and in the second sugar (2) for the strain set (wt, ΔrelA and SpoT E319Q). Data correspond to those used in figures 1, 2, 4 and 5.

## Sheet: mutants
			WT	ΔrelA	SpoT E319Q
Δcrp pCRP		diaixic time	74.93 ± 10.17	253.19 ± 54.08	93.85 ± 10.07
		dbl/h (1)	0.43 ± 0.07	0.44 ± 0.06	0.44 ± 0.04
		dbl/h (2)	0.46 ± 0.04	0.39 ± 0.06	0.39 ± 0.02
ΔfruR		diaixic time	54.18 ± 3.69	82.94 ± 9.92	71.09 ± 7.53
		dbl/h (1)	0.49 ± 0.03	0.57 ± 0.03	0.47 ± 0.02
		dbl/h (2)	0.37 ± 0.03	0.52 ± 0.02	0.35 ± 0.02
Δmlc		diaixic time	44.81 ± 6.01	69.06 ± 4.49	55.27 ± 1.6
		dbl/h (1)	0.56 ± 0.01	0.59 ± 0.05	0.49 ± 0.04
		dbl/h (2)	0.48 ± 0.05	0.40 ± 0.04	0.43 ± 0.02
ΔdauA	glu + lac	diaixic time	49.25 ± 4.49	63.60 ± 5.35	52.75 ± 3.60
		dbl/h (1)	0.50 ± 0.04	0.64 ± 0.06	0.61 ± 0.03
		dbl/h (2)	0.45 ± 0.03	0.58 ± 0.03	0.56 ± 0.02
	glu + lac + succ	diaixic time	32.42 ± 3.35	26.80 ± 7.07	33.00 ± 4.76
		dbl/h (1)	0.63 ± 0.05	0.76 ± 0.05	0.67 ± 0.05
		dbl/h (2)	0.50 ± 0.03	0.58 ± 0.04	0.57 ± 0.03
ΔdctA	glu + lac	diaixic time	49.93 ± 3.93	61.92 ± 4.75	54.48 ± 2.52
		dbl/h (1)	0.62 ± 0.02	0.70 ± 0.03	0.64 ± 0.04
		dbl/h (2)	0.56 ± 0.03	0.61 ± 0.03	0.58 ± 0.02
	glu + lac + succ	diaixic time	29.36 ± 2.99	26.51 ± 3.66	31.08 ± 7.67
		dbl/h (1)	0.66 ± 0.03	0.76 ± 0.06	0.67 ± 0.04
		dbl/h (2)	0.57 ± 0.03	0.56 ± 0.02	0.57 ± 0.02
ΔsatP	glu + lac	diaixic time	44.94 ± 3.18	61.69 ± 7.47	53.27 ± 2.24
		dbl/h (1)	0.55 ± 0.04	0.72 ± 0.04	0.61 ± 0.05
		dbl/h (2)	0.51 ± 0.05	0.66 ± 0.09	0.56 ± 0.02
	glu + lac + succ	diaixic time	32.18 ± 2.69	41.83 ± 4.31	39.61 ± 3.19
		dbl/h (1)	0.64 ± 0.04	0.79 ± 0.05	0.69 ± 0.04
		dbl/h (2)	0.52 ± 0.03	0.73 ± 0.05	0.59 ± 0.02
ΔackA	glu + lac	diaixic time	71.62 ± 15.36	76.53 ± 11.03	73.28 ± 15.84
		dbl/h (1)	0.38 ± 0.04	0.31 ± 0.01	0.38 ± 0.02
		dbl/h (2)	0.41 ± 0.03	0.37 ± 0.04	0.41 ± 0.03
	glu + lac + succ	diaixic time	81.32 ± 7.29	83.24 ± 5.25	73.66 ± 6.68
		dbl/h (1)	0.33 ± 0.03	0.30 ± 0.01	0.36 ± 0.01
		dbl/h (2)	0.44 ± 0.01	0.48 ± 0.03	0.47 ± 0.01
